# Supplementary material for: Does time management work? A meta-analysis
Source: PubMed Central journal article supplement (PMC7799745; doi:10.1371/journal.pone.0245066), 2021-01-11

# Supporting File S1. Funnel Plots.

**Funnel plot: time management and distress.** Funnel plot of standard error by Fisher's Z.

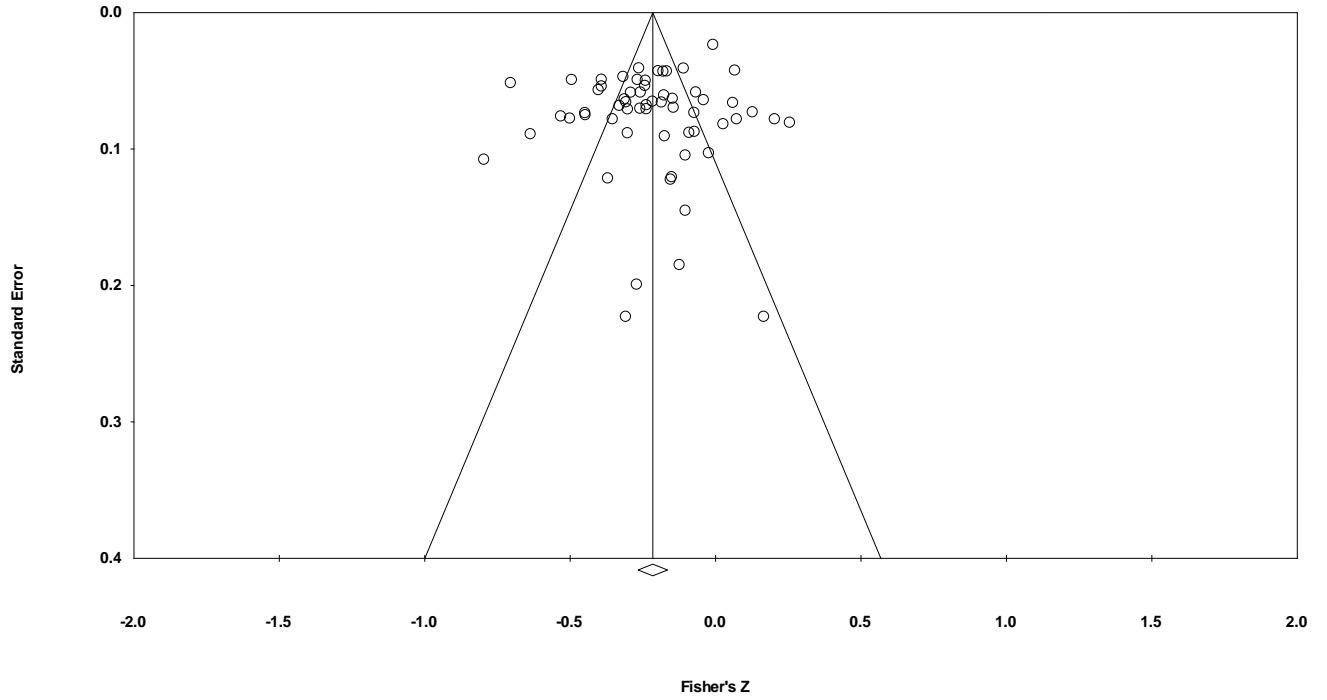

**Funnel plot: time management and wellbeing.** Funnel plot of standard error by Fisher's Z.

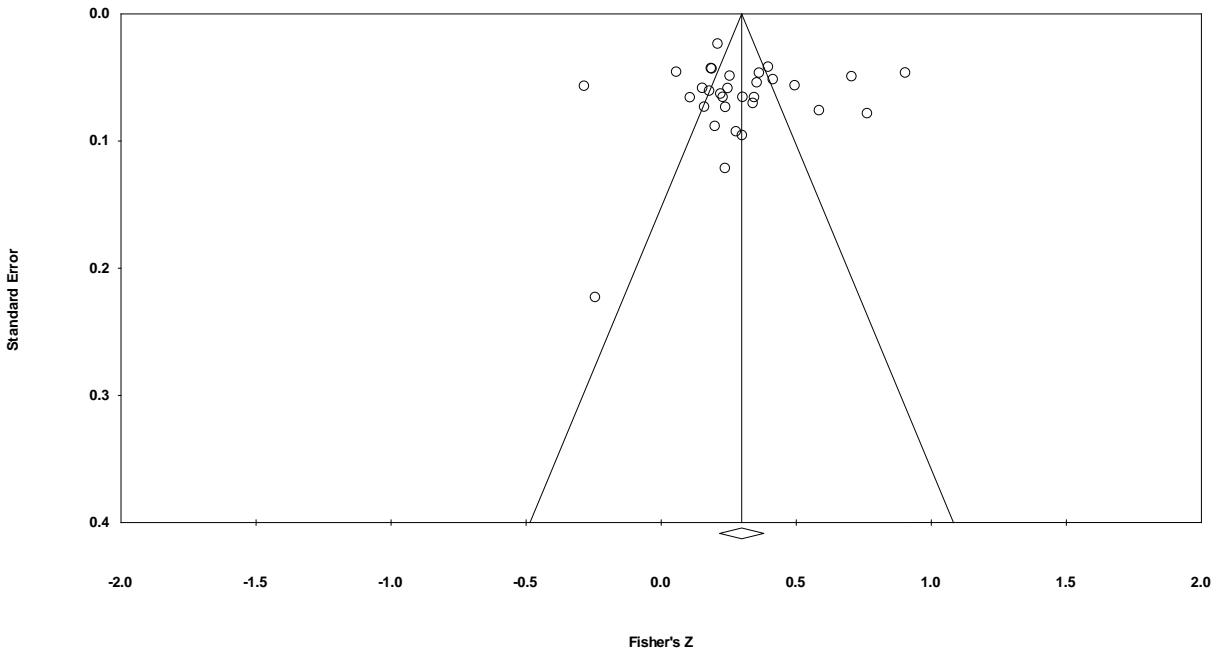

**Funnel plot: time management and academic achievement.** Funnel plot of standard error by Fisher's Z.

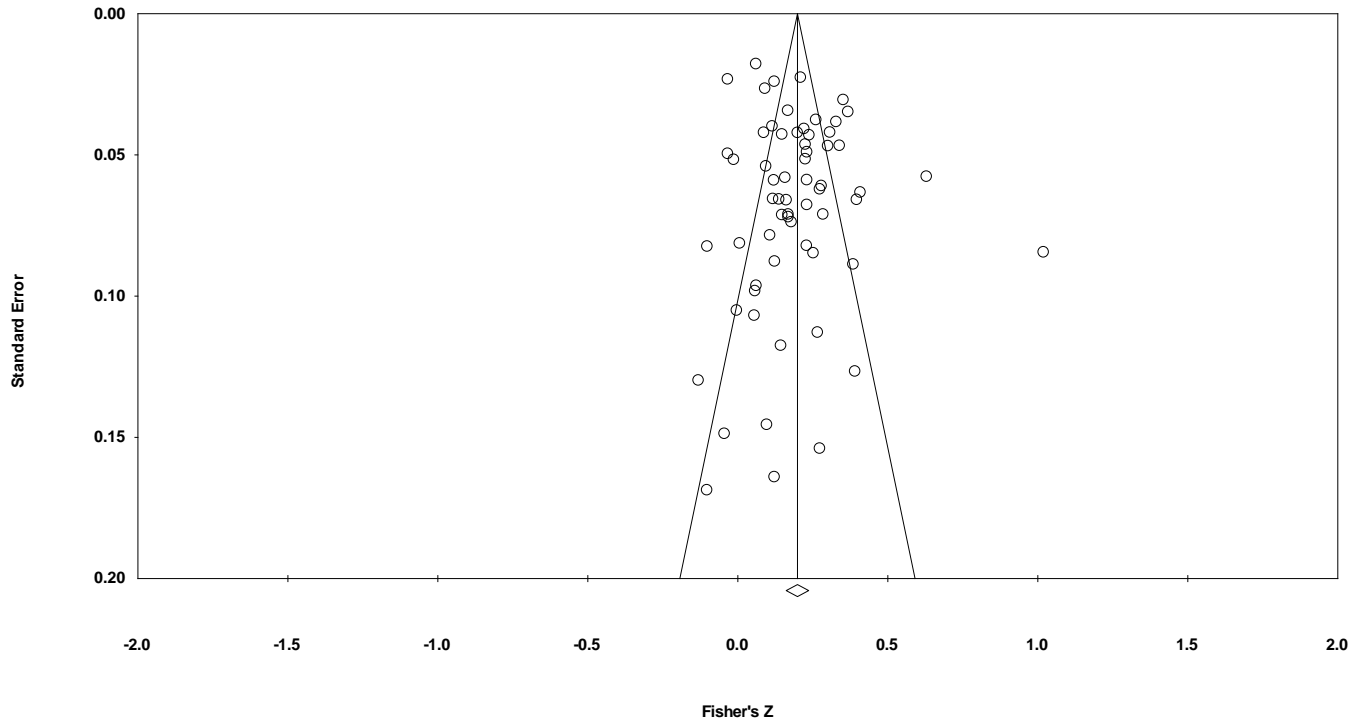

**Funnel plot: time management and job performance.** Funnel plot of standard error by Fisher's Z.

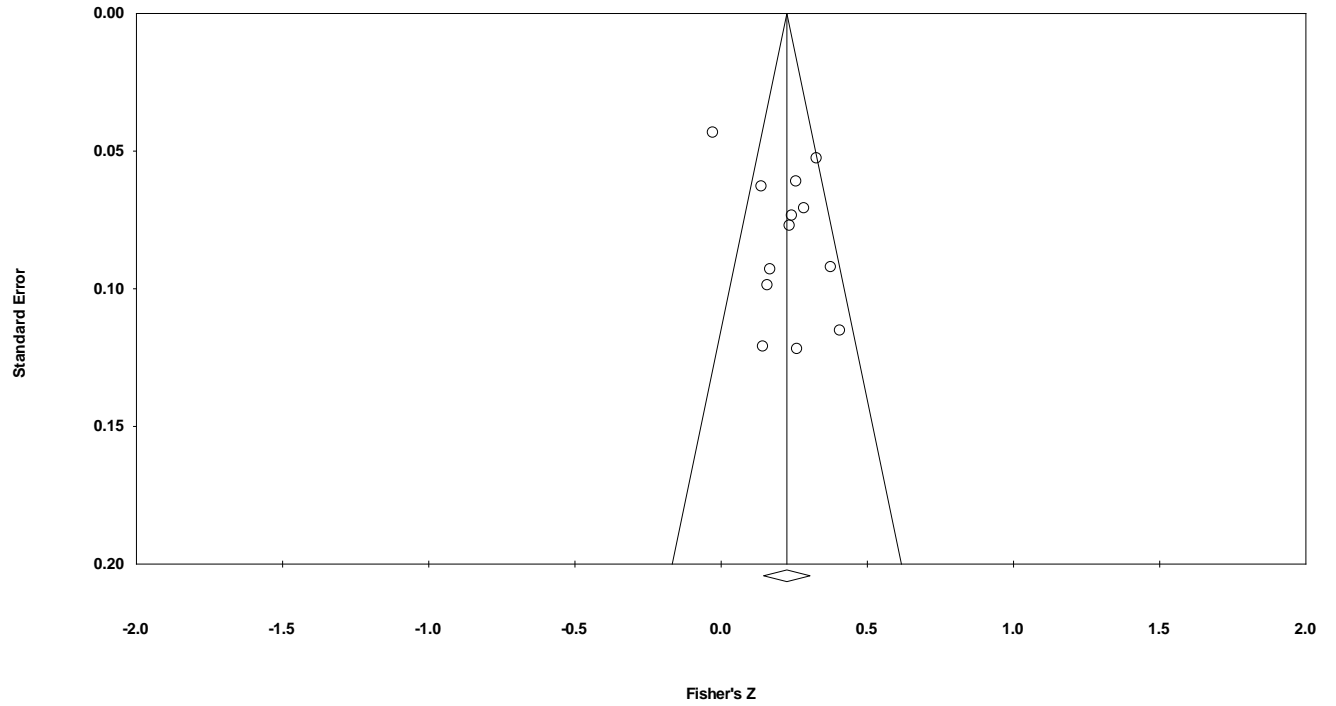

Supplement: pone.0245066.s002.pdf [file pone.0245066.s002.pdf]
